# Supplementary material for: Increased phosphorylation of collapsin response mediator protein-2 at Thr514 correlates with β-amyloid burden and synaptic deficits in Lewy body dementias
Source: PubMed Central journal article supplement (PMC5016931; doi:10.1186/s13041-016-0264-9), 2016-09-08
Supplement: 13041_2016_264_MOESM1_ESM.pdf [file 13041_2016_264_MOESM1_ESM.pdf]

**Xing *et al.* Increased phosphorylation of collapsin response mediator protein-2 at Thr514 correlates with  $\beta$ -amyloid burden and synaptic deficits in Lewy Body dementias**

*Additional File 1: Supplementary Figure 1*

CRMP2 is concentrated in cytosol-enriched fractions of postmortem human neocortex

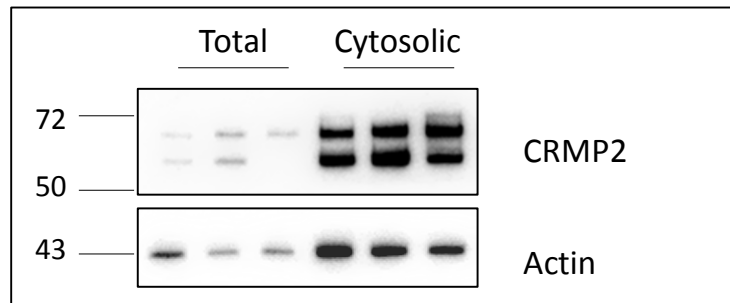

**Fig. S1** Representative CRMP2 immunoblots of total and cytosol-enriched (“Cytosolic”) fractions of postmortem human neocortex (5  $\mu$ g protein loaded per lane).  $\beta$ -actin was used as a control to show concentration of soluble cytoskeletal proteins, including CRMP2, in the cytosol-enriched fractions using the fractionation procedure described in Methods.
