# Supplementary material for: Increased phosphorylation of collapsin response mediator protein-2 at Thr514 correlates with β-amyloid burden and synaptic deficits in Lewy body dementias
Source: PubMed Central journal article supplement (PMC5016931; doi:10.1186/s13041-016-0264-9), 2016-09-08
Supplement: 13041_2016_264_MOESM2_ESM.pdf [file 13041_2016_264_MOESM2_ESM.pdf]

**Xing *et al.* Increased phosphorylation of collapsin response mediator protein-2 at Thr514 correlates with  $\beta$ -amyloid burden and synaptic deficits in Lewy Body dementias**

*Additional File 2: Supplementary Figure 2*

pThr514 CRMP2 is increased in total homogenate fractions of DLB

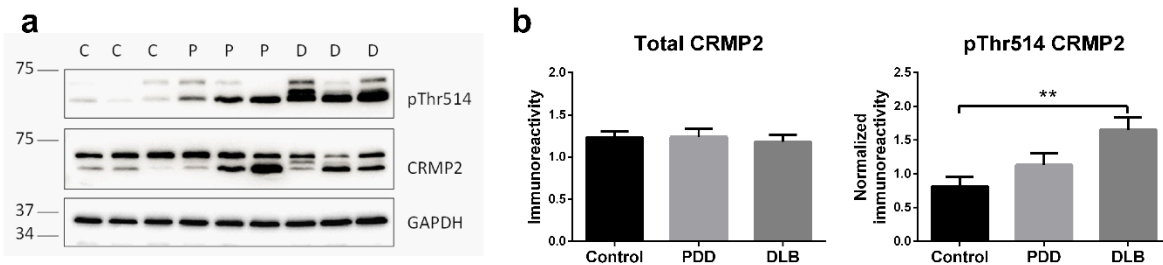

**Fig. S2 a** Representative immunoblots (with molecular weight indicators in kDa to the left) and **b** bar graphs of immunoreactivities of total CRMP2 and pThr514 CRMP2 normalized to total CRMP2 (mean  $\pm$  SEM in arbitrary units) in total brain homogenate fractions, with GAPDH used as loading control. Available  $N$  for control (C) = 19; PDD (P) = 19 and DLB (D) = 20.

\*\* $p < 0.01$ , significant difference for multiple pair-wise comparisons (one-way ANOVA with Bonferroni *post-hoc* tests).
