# Supplementary material for: Increased phosphorylation of collapsin response mediator protein-2 at Thr514 correlates with β-amyloid burden and synaptic deficits in Lewy body dementias
Source: PubMed Central journal article supplement (PMC5016931; doi:10.1186/s13041-016-0264-9), 2016-09-08
Supplement: 13041_2016_264_MOESM3_ESM.pdf [file 13041_2016_264_MOESM3_ESM.pdf]

**Xing *et al.* Increased phosphorylation of collapsin response mediator protein-2 at Thr514 correlates with  $\beta$ -amyloid burden and synaptic deficits in Lewy Body dementias**

*Additional File 3: Supplementary Figure 3*

No correlation of pSer522, pThr509 and 3F4 CRMP2 immunoreactivities with  $A\beta_{42} : A\beta_{40}$  in LBD parietal cortex

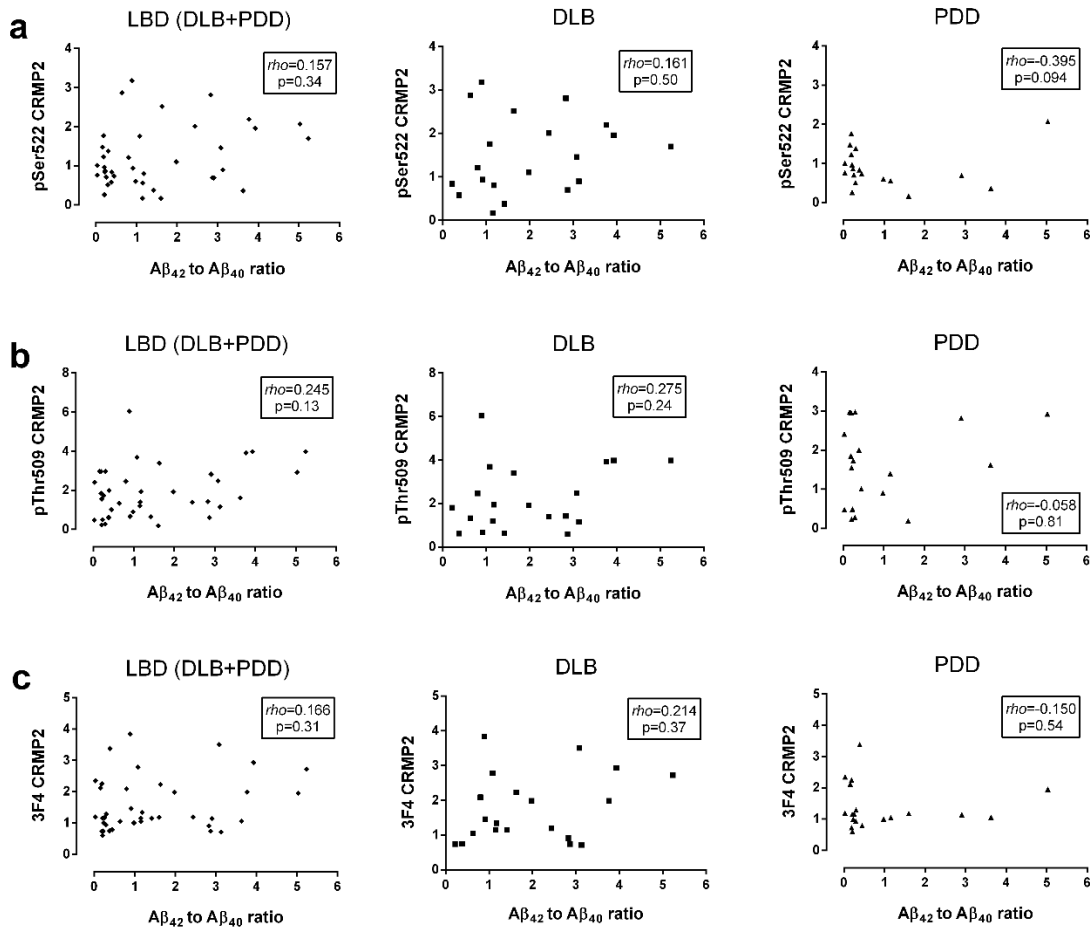

**Fig. S3** Scatter plots of soluble  $A\beta_{42}$  to  $A\beta_{40}$  ratio and pCRMP2 phosphorylation at **a** Ser522, **b** Thr509 and **c** 3F4 within the combined LBD (DLB+PDD), DLB and PDD groups. Correlations were assessed by Spearman correlation, with insets indicating  $\rho$  and p values. No significant correlation was observed.
