# Supplementary material for: Increased phosphorylation of collapsin response mediator protein-2 at Thr514 correlates with β-amyloid burden and synaptic deficits in Lewy body dementias
Source: PubMed Central journal article supplement (PMC5016931; doi:10.1186/s13041-016-0264-9), 2016-09-08
Supplement: 13041_2016_264_MOESM4_ESM.pdf [file 13041_2016_264_MOESM4_ESM.pdf]

**Xing *et al.* Increased phosphorylation of collapsin response mediator protein-2 at Thr514 correlates with  $\beta$ -amyloid burden and synaptic deficits in Lewy Body dementias**

*Additional File 4: Supplementary Figure 4*

No correlation between pThr514 CRMP2 and pSer396 tau in LBD parietal cortex

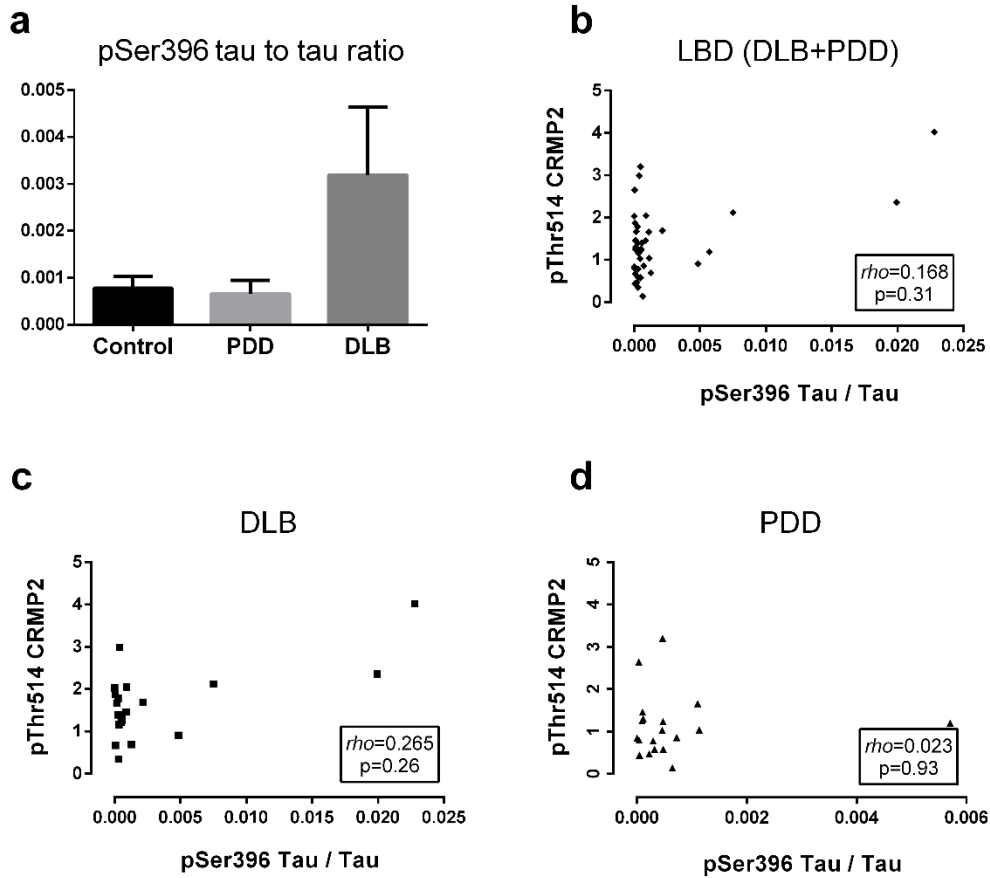

**Fig. S4** a Bar graph of mean ( $\pm$  SEM) pSer396 tau to total tau ratios. Scatter plots of pThr514 CRMP2 with pSer396 tau : total tau in total homogenate fractions of **b** LBD (DLB + PDD), **c** DLB and **d** PDD parietal cortex, with insets indicating  $\rho$  and  $p$  values. Available  $N$  for control = 19; PDD = 19 and DLB = 20. No significant differences ( $p > 0.05$ ) were found for multiple pair-wise comparisons of pSer396 : total tau between groups (Kruskal-Wallis H tests), or for pThr514 CRMP2 correlations with pSer396 tau : total tau ratios (Spearman).
