# Supplementary material for: Increased phosphorylation of collapsin response mediator protein-2 at Thr514 correlates with β-amyloid burden and synaptic deficits in Lewy body dementias
Source: PubMed Central journal article supplement (PMC5016931; doi:10.1186/s13041-016-0264-9), 2016-09-08
Supplement: 13041_2016_264_MOESM5_ESM.pdf [file 13041_2016_264_MOESM5_ESM.pdf]

## Xing *et al.* Increased phosphorylation of collapsin response mediator protein-2 at Thr514 correlates with $\beta$ -amyloid burden and synaptic deficits in Lewy Body dementias

### Additional File 5: Supplementary Figure 5

No correlation between pThr514 CRMP2 and  $\alpha$ -synuclein immunoreactivity in LBD parietal cortex

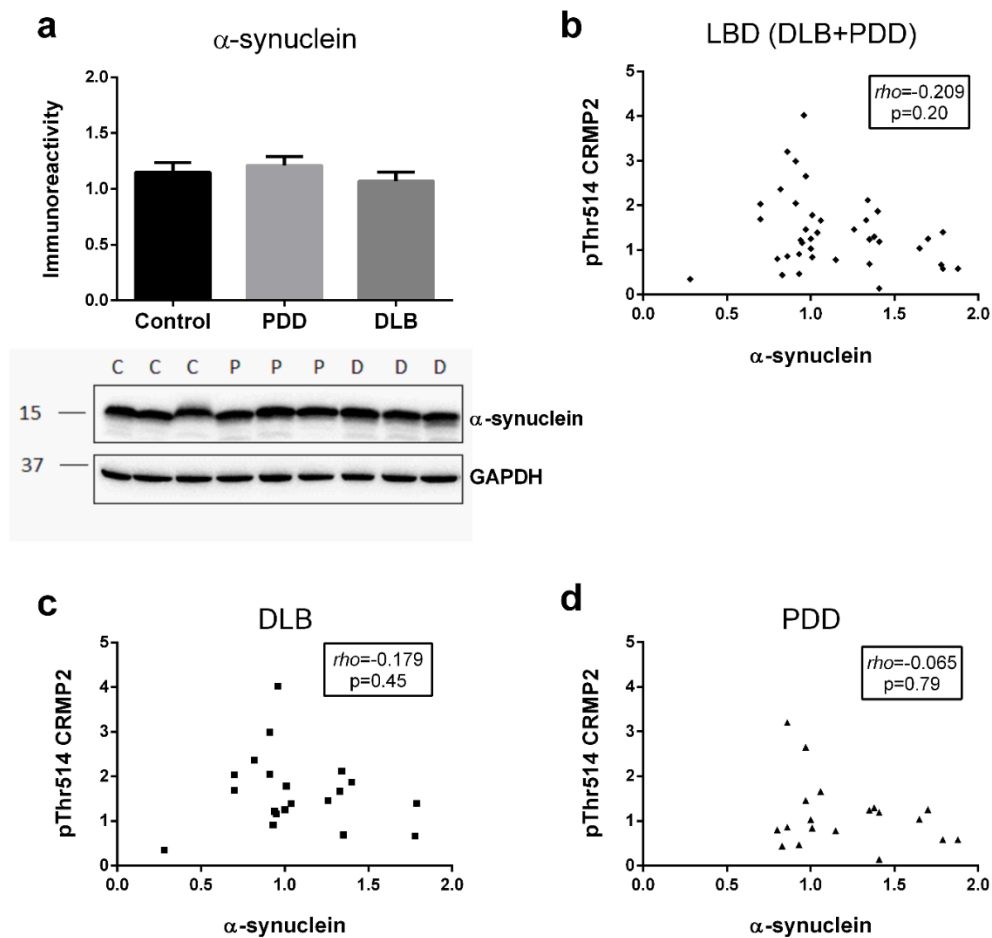

**Fig. S5** a Bar graph of  $\alpha$ -synuclein immunoreactivity (mean  $\pm$  SEM in arbitrary units) with representative immunoblots, with GAPDH as loading control. Scatter plots of pThr514 CRMP2 with  $\alpha$ -synuclein immunoreactivity in total homogenate fractions of **b** LBD (DLB + PDD), **c** DLB and **d** PDD parietal cortex, with insets indicating  $\rho$  and  $p$  values. Available  $N$  for control (C) = 19; PDD (P) = 19 and DLB (D) = 20. No significant differences ( $p > 0.05$ ) were found for multiple pair-wise comparisons of  $\alpha$ -synuclein between groups (one-way ANOVA with Bonferroni's *post-hoc* tests), or for pThr514 CRMP2 correlations with  $\alpha$ -synuclein (Spearman).
