# Supplementary material for: Increased phosphorylation of collapsin response mediator protein-2 at Thr514 correlates with β-amyloid burden and synaptic deficits in Lewy body dementias
Source: PubMed Central journal article supplement (PMC5016931; doi:10.1186/s13041-016-0264-9), 2016-09-08
Supplement: 13041_2016_264_MOESM6_ESM.pdf [file 13041_2016_264_MOESM6_ESM.pdf]

**Xing *et al.* Increased phosphorylation of collapsin response mediator protein-2 at Thr514 correlates with  $\beta$ -amyloid burden and synaptic deficits in Lewy Body dementias**

*Additional File 6: Supplementary Figure 6*

No correlation between pThr514 CRMP2 and insoluble pSer129  $\alpha$ -synuclein immunoreactivity in LBD parietal cortex

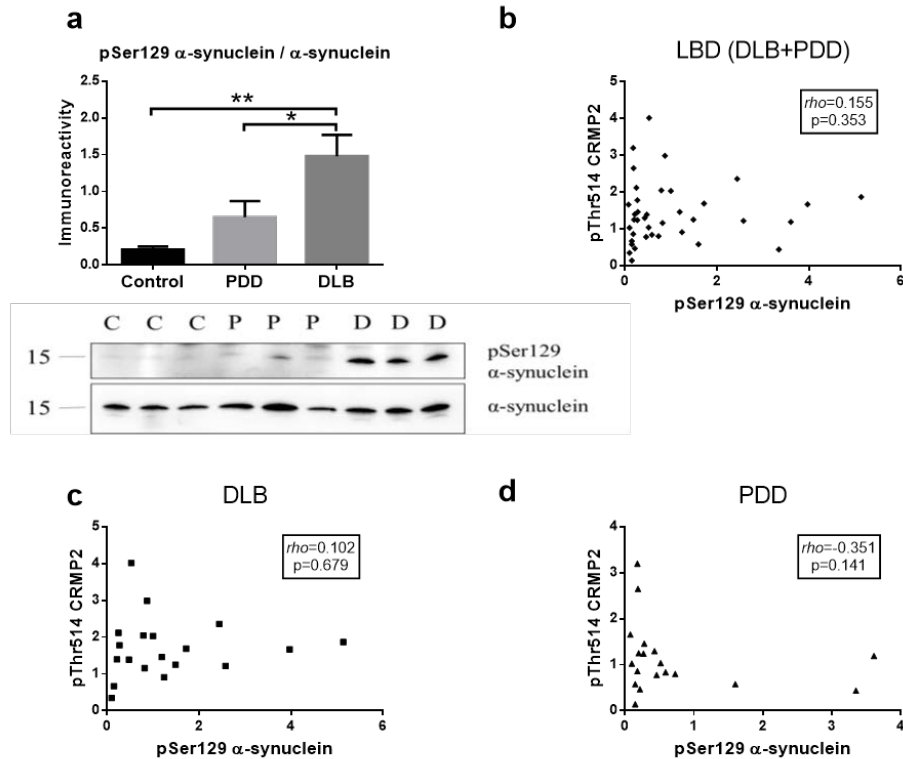

**Fig. S6 a** Bar graphs of pSer129  $\alpha$ -synuclein normalized to  $\alpha$ -synuclein immunoreactivities in the insoluble fraction (mean  $\pm$  SEM in arbitrary units) with representative immunoblots. Scatter plots of pThr514 CRMP2 with pSer129  $\alpha$ -synuclein immunoreactivity of **b** LBD (DLB + PDD), **c** DLB and **d** PDD parietal cortex, with insets indicating  $\rho$  and  $p$  values. Available  $N$  for control (C) = 19; PDD (P) = 19 and DLB (D) = 19. One DLB sample was excluded as an outlier due to pSer129  $\alpha$ -synuclein value  $> 8$ , the inclusion of which did not alter the significance of the results (data not shown).

\* $p < 0.05$ , \*\* $p < 0.01$ , significant differences for multiple pair-wise comparisons (Kruskal-Wallis H with Dunn's *post-hoc* tests). No significant differences ( $p > 0.05$ ) were found for pThr514 CRMP2 correlations with pSer129  $\alpha$ -synuclein (Spearman).
