# Supplementary material for: Increased phosphorylation of collapsin response mediator protein-2 at Thr514 correlates with β-amyloid burden and synaptic deficits in Lewy body dementias
Source: PubMed Central journal article supplement (PMC5016931; doi:10.1186/s13041-016-0264-9), 2016-09-08
Supplement: 13041_2016_264_MOESM7_ESM.pdf [file 13041_2016_264_MOESM7_ESM.pdf]

**Xing *et al.* Increased phosphorylation of collapsin response mediator protein-2 at Thr514 correlates with  $\beta$ -amyloid burden and synaptic deficits in Lewy Body dementias**

*Additional File 7: Supplementary Figure 7*

Unchanged PP2A C-subunit immunoreactivity in DLB parietal cortex

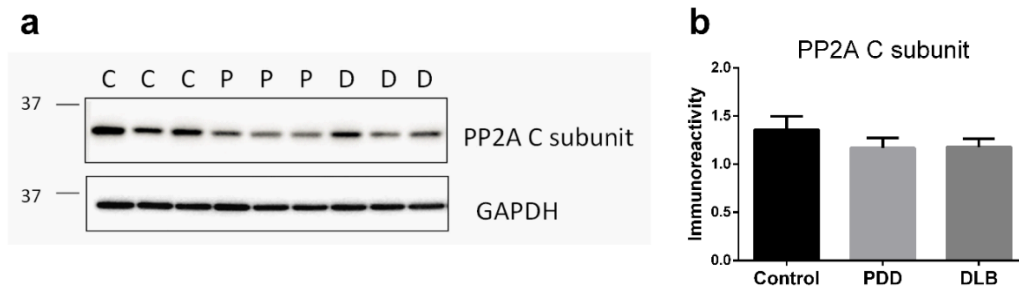

**Fig. S7** **a** Representative immunoblots and **b** bar graphs of PP2A C-subunit immunoreactivity (mean  $\pm$  SEM in arbitrary units), with GAPDH as loading control. Available  $N$  for control (C) = 19; PDD (P) = 19 and DLB (D) = 20. No significant differences ( $p > 0.05$ ) were found for multiple pair-wise comparisons of PP2A C-subunit between groups (one-way ANOVA with Bonferroni's *post-doc* tests).
